# Supplementary material for: The electronic structures of group-V–group-IV hetero-bilayer structures: a first-principles study
Source: Royal Society of Chemistry journal article supplement (doi:10.1039/c5cp04815j), 2015-01-01
Supplement: c5cp04815j1.pdf [file c5cp04815j1.pdf]

## Supporting Information For

### Electronic Structures of Group-V – Group-IV Hetero-bilayer

#### Structures: A First-principles Study

Yanli Wang<sup>a</sup>, and Yi Ding<sup>b</sup>

a. Department of Physics, Center for Optoelectronics Materials and Devices, Zhejiang Sci-Tech University, Xiasha College Park, Hangzhou, Zhejiang 310018, People's Republic of China. E-mail: wangyanli-04@tsinghua.org.cn

b. Department of Physics, Hangzhou Normal University, Hangzhou, Zhejiang 310036, People's Republic of China. E-mail: dingyi2001@tsinghua.org.cn

#### Contents:

1. Figure S1. The atomic structures and band structures of As(3,1)-C(3,3) and Sb(5,0)-Si(4,2) hetero-sheets.
2. Figure S2. The partial charge densities of the valence band and conduction band states at the Diract point of Sb-Si hetero-sheet.
3. Figure S3. The height distributions of atoms at the interface of As/Sb-C/Si hetero-sheets .
4. Figure S4. The minimum and maximum values of interlayer distances in the As/Sb-C/Si hetero-sheets.
5. Table S1. The relative energies for the top, hollow, and bridge site conformations of As/Sb-C/Si hetero-sheets.

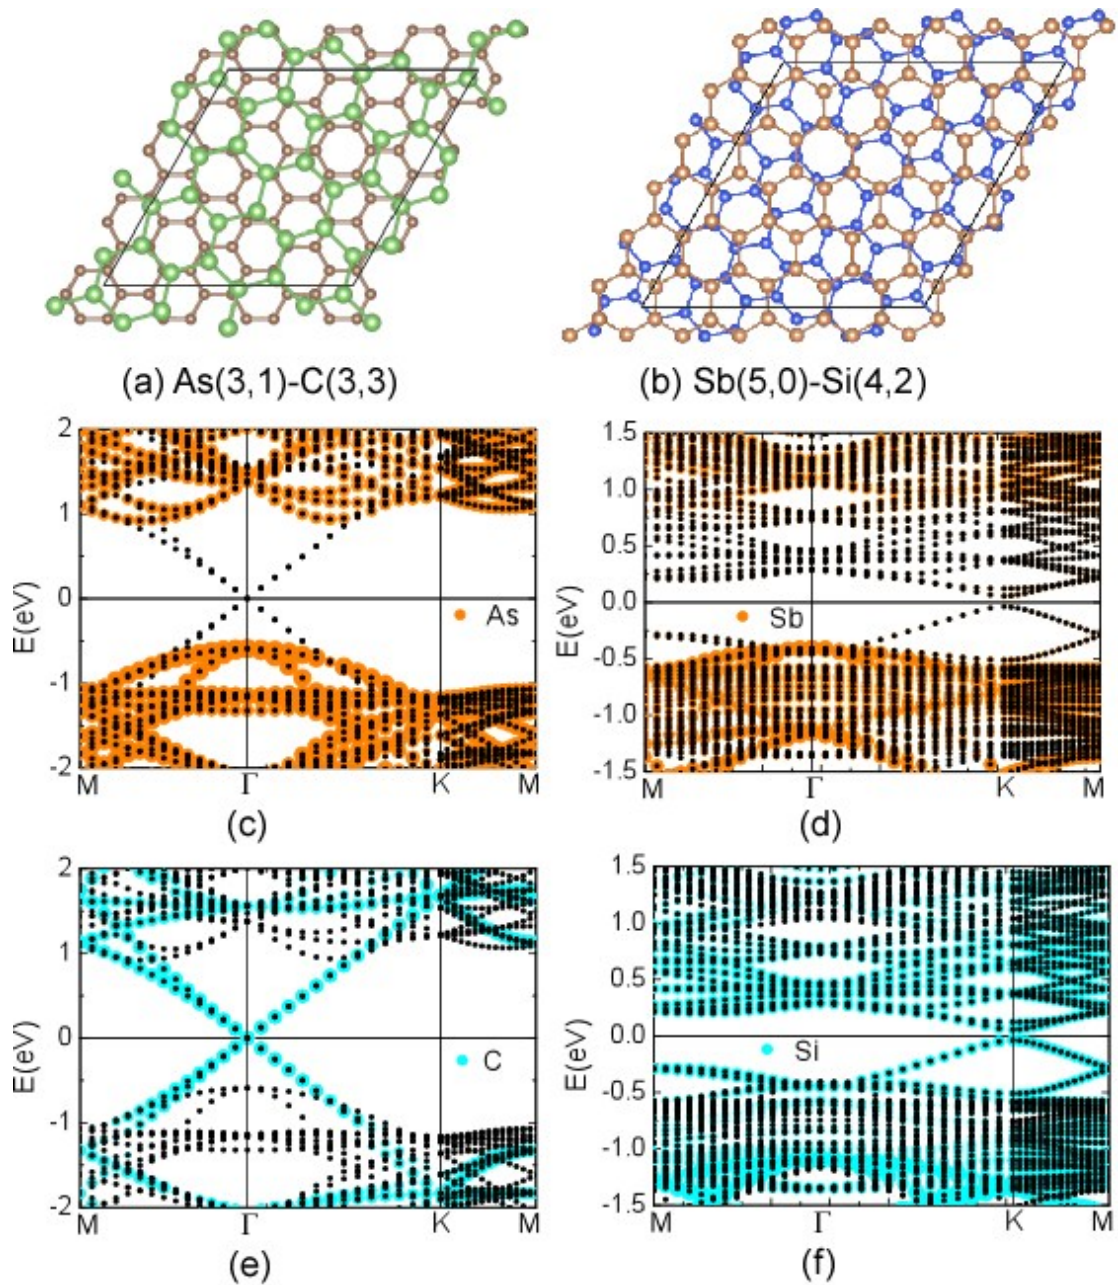

**Figure S1:** The atomic structures and band structures of [(a),(c),(e)] As(3,1)-C(3,3) and [(b),(d),(f)] Sb(5,0)-Si(4,2) hetero-sheets. The bands projected to As (Sb) and C (Si) orbitals are highlighted by orange and cyan circles, and the size corresponds to the weight of each species in the bands.

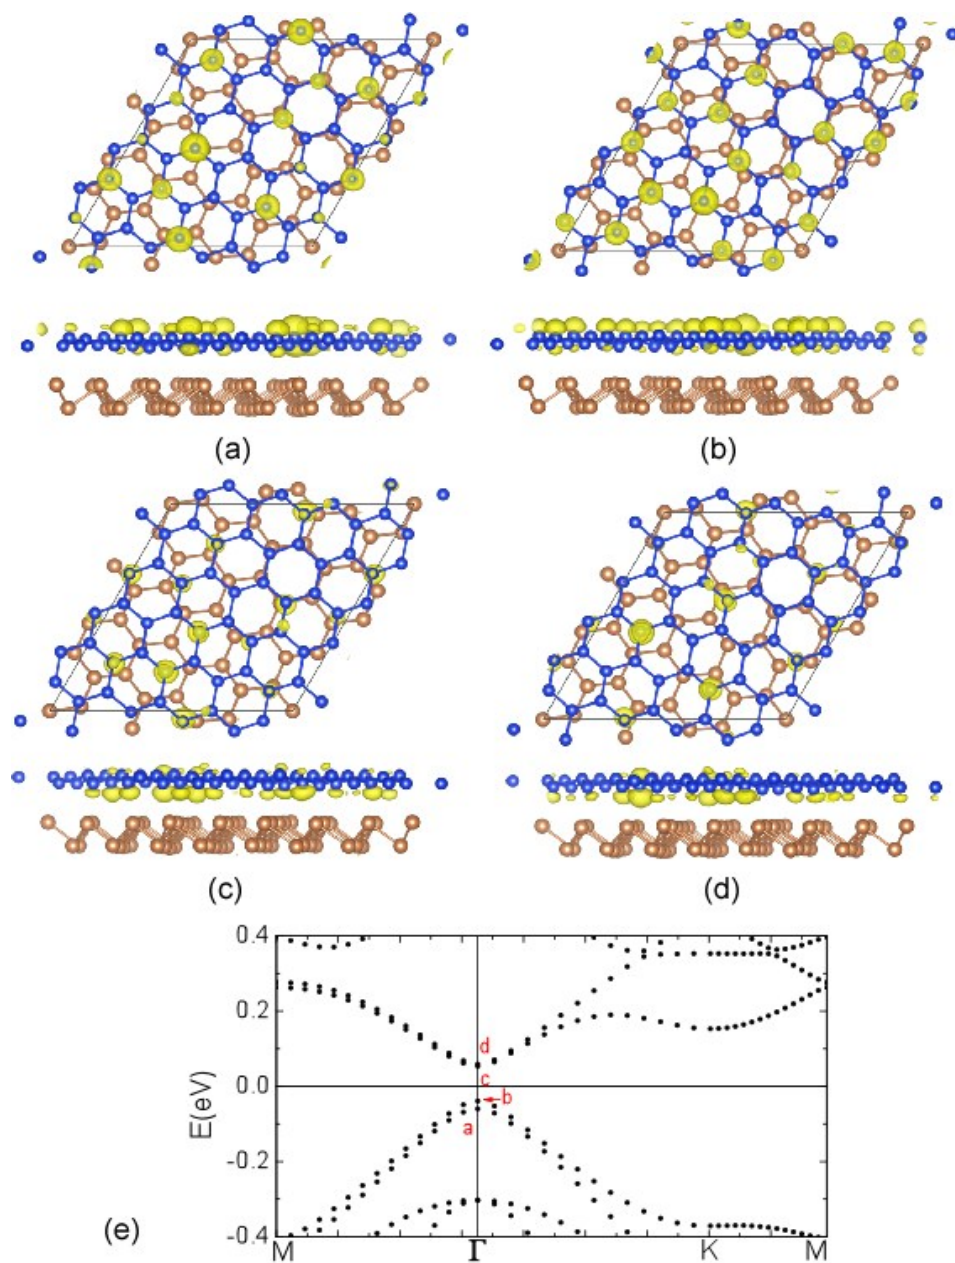

**Figure S2:** The partial charge densities of [(a),(b)] the valence band states and [(c),(d)] the conduction band states in the Sb-Si hetero-sheet, for which the corresponding energy points are marked in (e).

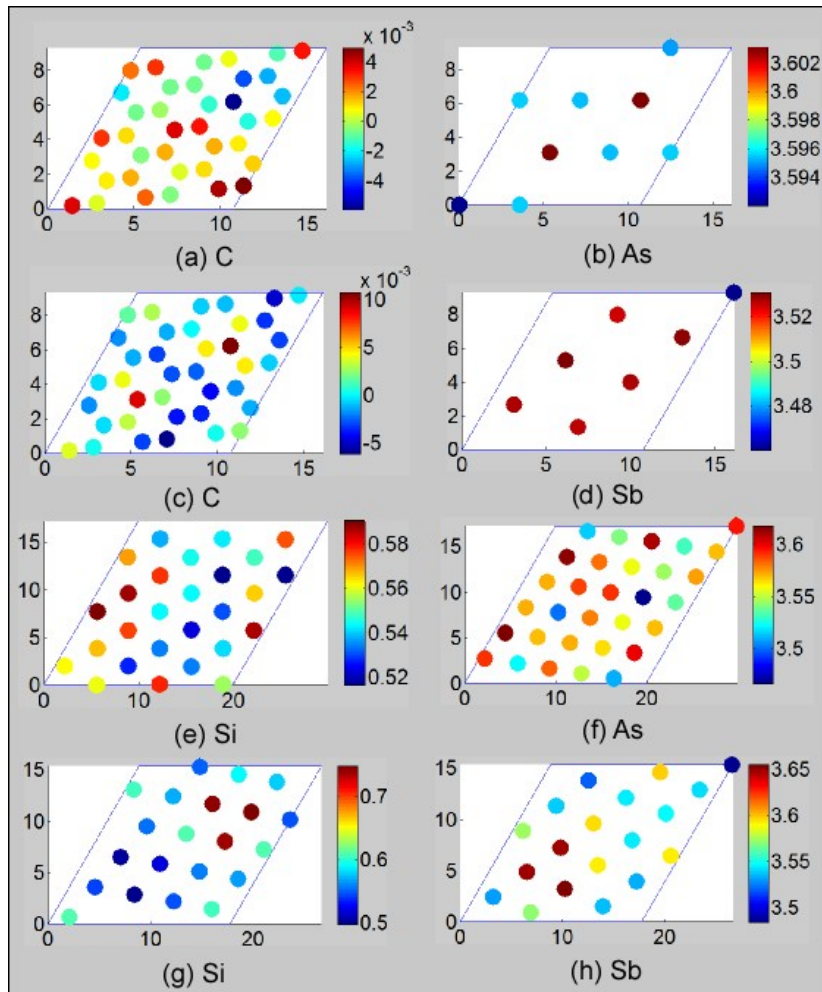

**Figure S3:** The height distributions of atoms at the interface of [(a),(b)] As-C, [(c),(d)] Sb-C, [(e),(f)] As-Si, and [(g),(h)] Sb-Si hetero-sheets. Since the As, Sb and Si layers are buckled with a chair-like conformation, only the atoms located at the inside of the hetero-sheets are displayed in the figures.

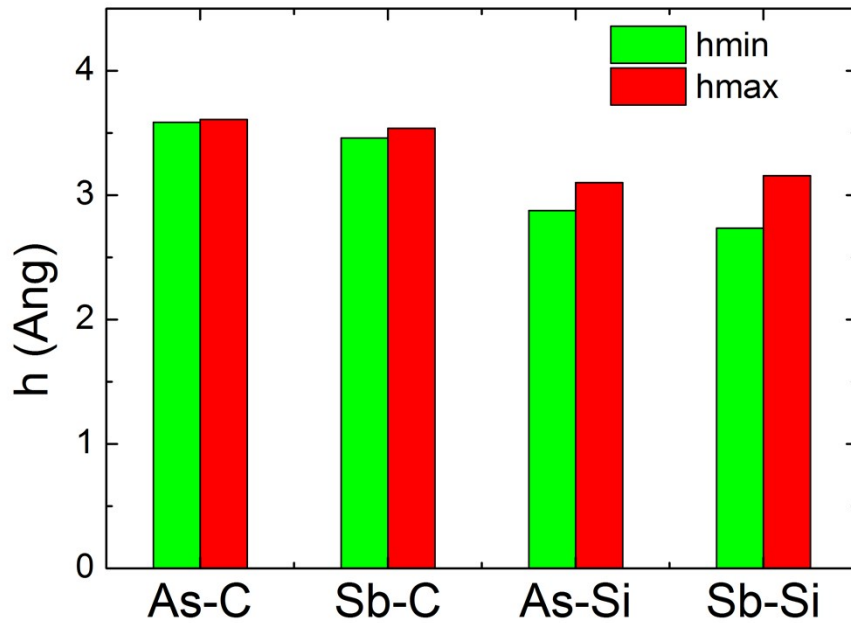

**Figure S4.** The minimum and maximum values of interlayer distances in the As/Sb-C/Si hetero-sheets. The  $h_{\min}$  ( $h_{\max}$ ) values are calculated as the differences between the smallest (largest) height in the upper layer and the largest (smallest) height in the bottom layer. Since the interlayer distance is determined by the atoms at the interface region of hetero-sheets, only the atoms at the interface are considered for the buckled As, Sb, Si layers.

|                   | Top   | Hollow          | Bridge              |
|-------------------|-------|-----------------|---------------------|
| As-C heterosheet  | 1.02  | <i><b>0</b></i> | 0.69                |
| Sb-C heterosheet  | 6.22  | <i><b>0</b></i> | 3.98                |
| As-Si heterosheet | 11.49 | 0               | <i><b>-2.67</b></i> |
| Sb-Si heterosheet | 25.33 | <i><b>0</b></i> | 5.19                |

**Table. S1:** The relative energies for the top, hollow, and bridge site conformations of As/Sb-C/Si hetero-sheets. Here, the energy of hollow site conformation is used as a reference in each hetero-sheet. The unit is meV per supercell in the table. The smallest value, which is marked in a bold Italic, corresponds to the most stable conformation of the hetero-sheet.
